# Supplementary material for: Generation of DelNS1 Influenza Viruses: a Strategy for Optimizing Live Attenuated Influenza Vaccines
Source: PubMed Central journal article supplement (PMC6751066; doi:10.1128/mbio.02180-19), 2019-09-17
Supplement: mBio.02180-19-sf002.pdf [file mBio.02180-19-sf002.pdf]

Fig S2

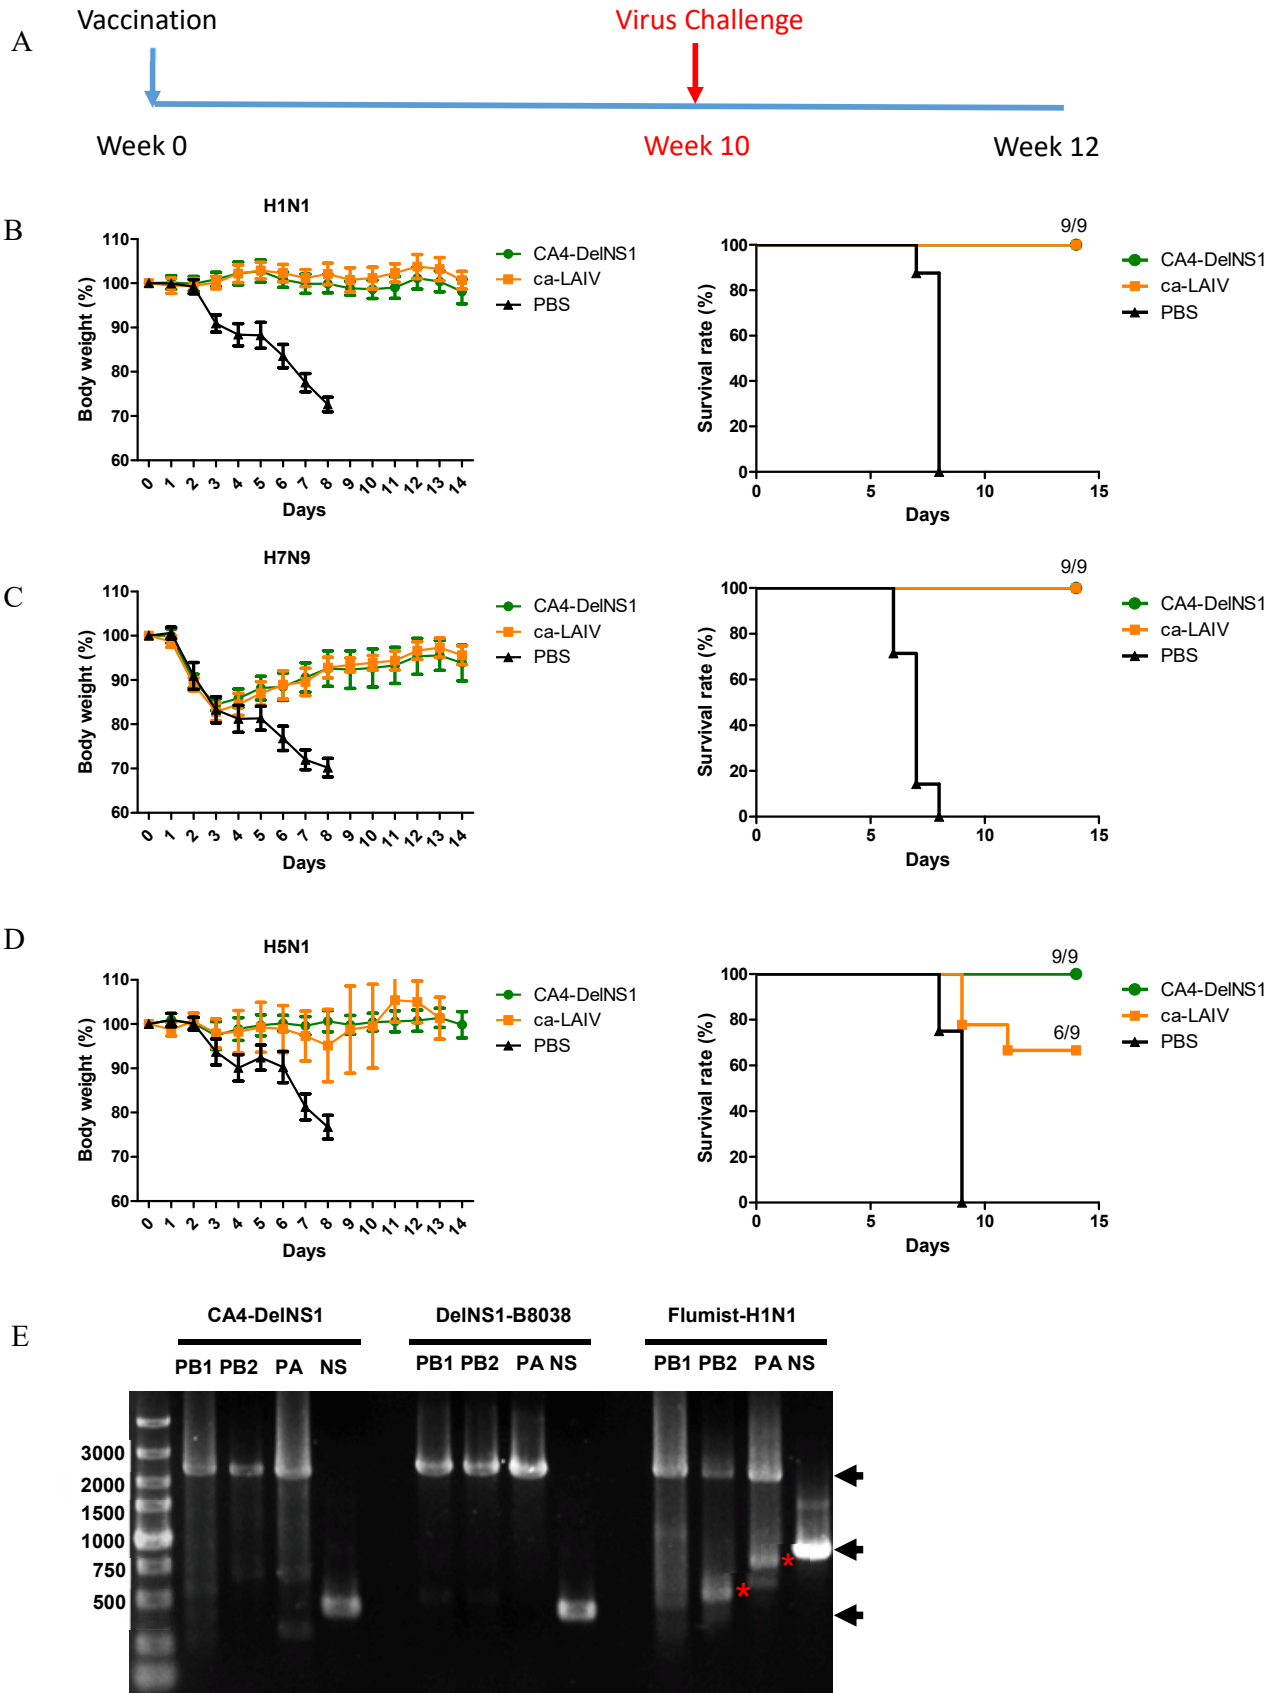

**Fig. S2 CA4-DelNS1 LAIV vaccination protects mice from both homologous and heterologous virus challenge.**

(A) Timelines for vaccination and virus challenge. Mice were intranasally vaccinated once with either CA4-DelNS1 ( $2 \times 10^6$  pfu), ca-LAIV ( $2 \times 10^6$  pfu) or PBS then challenged with virus after 10 weeks. Vaccinated mice were challenged with either 10 MLD<sub>50</sub> CA4 (H1N1) mouse-adapted virus (B), 10 MLD<sub>50</sub> H7N9 (C), or 100 MLD<sub>50</sub> H5N1 (D). Body weights and survival were observed for 14 days. Body weight data represents mean values  $\pm$  standard deviation from 6 mice. (E) Detection of DI RNA in CA4-DelNS1, B-DelNS1, Flumist-H1N1. Gel analysis of the RT-PCR products of segment PB1, PB2, PA and NS of different vaccines. Virus strains were passaged in eggs and viral RNA was extracted and reverse transcribed. Viral polymerase genes and NS segment were amplified by PCR using long segment specific primers. The full length of the polymerase (PB1, PB2 and PA) and NS1 genes was indicated by solid arrowheads and the defective viral genome was indicated by asterisks (\*). The NS segment from CA4-DelNS1 and B-DelNS1 viruses contain deletion of NS1. PCR products were resolved in 1.5% agarose gel and stained by gel red and visualized by Azure 150 system.
