# Supplementary material for: Generation of DelNS1 Influenza Viruses: a Strategy for Optimizing Live Attenuated Influenza Vaccines
Source: PubMed Central journal article supplement (PMC6751066; doi:10.1128/mbio.02180-19), 2019-09-17
Supplement: mBio.02180-19-sf005.pdf [file mBio.02180-19-sf005.pdf]

**Fig. S5**

**A**

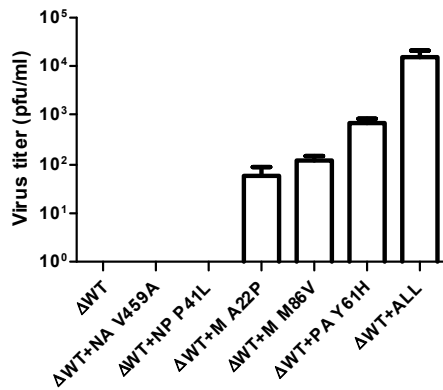

**B**

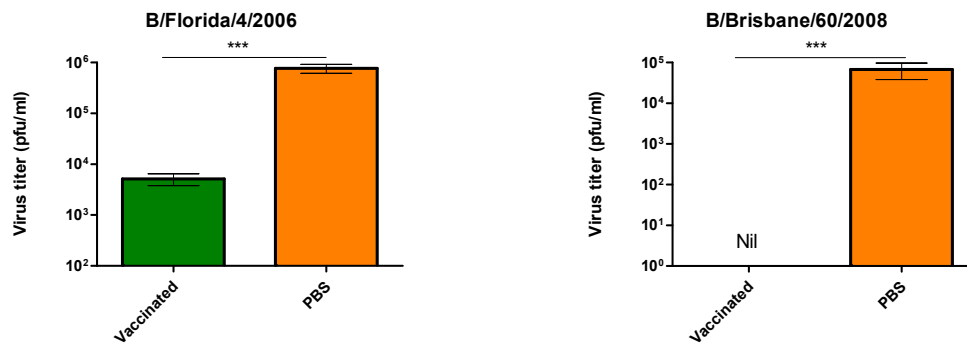

**Fig. S5 Viral titers in lungs of mice infected with mouse-adapted influenza B viruses.**

(A) Effect of adaptive mutations on efficiency of DelNS1-B8038 virus rescue. DelNS1-B8038 pHW2000 plasmids with individual or combined adaptive mutations or the original DelNS1 plasmid (DelNS1-B8038 WT) were transfected together with plasmids encoding the other 7 viral segments into 293T/MDCK cell mixtures and incubated at 33°C or 37°C. After 72 h, viral supernatants were collected and titrated. Mice were vaccinated with DelNS1-B8038 influenza B LAIV and three weeks later challenged with either Victoria or Yamagata lineage influenza B virus, as indicated in Fig. 5. After 3 days, mice were sacrificed, and lungs collected to determine virus titer by plaque assay. Lung viral titer data represents mean values  $\pm$  standard deviation from 3 mice. Statistical analysis between means was performed by Student's t-test: \*\*\*  $p < 0.001$ .
