# Supplementary material for: Generation of DelNS1 Influenza Viruses: a Strategy for Optimizing Live Attenuated Influenza Vaccines
Source: PubMed Central journal article supplement (PMC6751066; doi:10.1128/mbio.02180-19), 2019-09-17
Supplement: mBio.02180-19-sf007.pdf [file mBio.02180-19-sf007.pdf]

**Fig. S7**

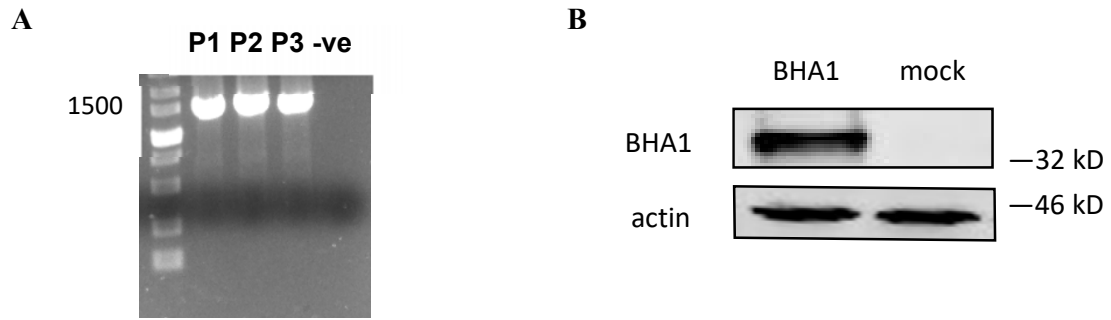

**Fig. S7 Construction of CA4-DelNS1 (H1N1) LAIV expressing influenza B HA1**

(A) RT-PCR of passages P1-P3 of CA4-DelNS1-BHA1 virus, showing the stability of the BHA1 insert.

(B) Western blot of BHA1 expression in lysates of CA4-DelNS1-BHA1 LAIV infected A549 cells.
